# Supplementary material for: Changes in Anticoagulant Utilization Among United States Nursing Home Residents With Atrial Fibrillation From 2011 to 2016
Source: PubMed Central journal article supplement — J Am Heart Assoc. 2019 May 2;8(9):e012023. doi: 10.1161/JAHA.119.012023 (PMC6512099; doi:10.1161/jaha.119.012023), 2019-05-02
Supplement: JAH3-8-e012023-s001.pdf [file JAH3-8-e012023-s001.pdf]

# **SUPPLEMENTAL MATERIAL**

**Table S1. ICD-9 and ICD-10 Code Based Definitions Applied to Medicare Part A Claims to Identify Specific Conditions.**

| Clinical Condition                         | ICD-9 CM Codes                                                                                                                                                                                                                                                                                                                                                                                                                                                                                                                                                                                                                                                                             | ICD-10 CM Codes <sup>a</sup>                                                                                                                                                                                                                                                                                                                                                                                                                                                                                                                                                                                                                                                                                                                                                                                                                                                                                                                                                          |
|--------------------------------------------|--------------------------------------------------------------------------------------------------------------------------------------------------------------------------------------------------------------------------------------------------------------------------------------------------------------------------------------------------------------------------------------------------------------------------------------------------------------------------------------------------------------------------------------------------------------------------------------------------------------------------------------------------------------------------------------------|---------------------------------------------------------------------------------------------------------------------------------------------------------------------------------------------------------------------------------------------------------------------------------------------------------------------------------------------------------------------------------------------------------------------------------------------------------------------------------------------------------------------------------------------------------------------------------------------------------------------------------------------------------------------------------------------------------------------------------------------------------------------------------------------------------------------------------------------------------------------------------------------------------------------------------------------------------------------------------------|
| Atrial fibrillation/flutter <sup>1,*</sup> | 42731, 42732                                                                                                                                                                                                                                                                                                                                                                                                                                                                                                                                                                                                                                                                               | I480, I481, I482, I483, I484, I4891, I4892                                                                                                                                                                                                                                                                                                                                                                                                                                                                                                                                                                                                                                                                                                                                                                                                                                                                                                                                            |
| Ischemic stroke <sup>2</sup>               | 43301, 43311, 43321, 43331, 43381, 43391, 43401, 43411, 43491, 436                                                                                                                                                                                                                                                                                                                                                                                                                                                                                                                                                                                                                         | I6302, I6312, I6322, I63239, I63232, I63231, I63139, I63132, I63131, I63039, I63032, I63031, I63011, I63012, I63019, I63111, I63112, I63119, I63211, I63212, I63219, I6359, I6319, I6309, I6329, I6320, I6310, I6300, I6330, I63311, I63312, I63319, I63321, I63322, I63329, I63331, I63332, I63339, I63341, I63342, I63349, I6339, I636, I6349, I63449, I63442, I63441, I63439, I69432, I69431, I63429, I63422, I63421, I63419, I63412, I63411, I63430, I6350, I63511, I63512, I63519, I63521, I63529, I63531, I63532, I63539, I63541, I63542, I63549, I6359, I638, I639, I6789                                                                                                                                                                                                                                                                                                                                                                                                      |
| Intracranial hemorrhage <sup>3</sup>       | 430, 431, 4320, 4321, 4329                                                                                                                                                                                                                                                                                                                                                                                                                                                                                                                                                                                                                                                                 | I609, I608, I607, I606, I6052, I6051, I6050, I604, I6032, I6031, I6030, I6022, I6021, I6020, I6012, I6011, I6010, I6002, I6001, I6000, I610, I611, I612, I613, I614, I615, I616, I618, I619, I621, I6200, I6201, I6202, I6203, I629                                                                                                                                                                                                                                                                                                                                                                                                                                                                                                                                                                                                                                                                                                                                                   |
| Extracranial bleeding <sup>3</sup>         | In primary position alone:<br>5310, 5312, 5314, 5316, 5320, 5322, 5324, 5326, 5330, 5332, 5334, 5336, 5340, 5342, 5344, 5346, 53501, 53511, 53521, 53531, 53541, 53551, 53561, 53783, 4560, 45620, 5307, 53082, 5780, 4552, 4555, 4558, 56202, 56203, 56212, 56213, 56881, 5693, 56985, 5781, 5789, 59381, 5997, 6238, 6262, 6266, 4230, 4590, 56881, 7191, 7847, 7848, 7863<br><br>In primary position, with above code in secondary position:<br>5311, 5313, 5315, 5317, 5319, 5321, 5323, 5325, 5327, 5329, 5331, 5333, 5335, 5337, 5339, 5341, 5343, 5345, 5347, 5349, 53500, 53510, 53520, 53530, 53540, 53550, 53560, 455, 56200, 56201, 56210, 56211, 5301, 2800, 2851, 2859, 79092 | In primary position alone:<br>K252, K254, K256, K260, K262, K264, K266, K270, K272, K274, K276, K280, K282, K284, K286, K2901, K2931, K2941, K2951, K2961, K2921, K2971, K2981, K2991, K31811, I8501, I8511, K226, K228, K920, K648, K643, K642, K641 K640, K5711, K5751, K5753, K5741, K5713, K5701, K5791, K5731, K5793, K5781, K5733, K5721, K661, K625, K5521, K921, K922, N280, R310, R311, R312, R319, N898, N920, N921, I312, R58, M2500, M25011, M25012, M25019, M25021, M25022, M25029, M25031, M25032, M25039, M25041, M25042, M25049, M25051, M25052, M25059, M25061, M25062, M25069, M25071, M25072, M25073, M25074, M25075, M25076, M2508, R040, R041, R042, R0481, R0489, R049<br><br>In primary position, with above code in secondary position:<br>K251, K253, K255, K257, K259, K261, K263, K265, K267, K269, K271, K273, K275, K277, K279, K281, K283, K285, K287, K289, K2900, K2930, K2960, K2920, K2930, K2970, K2980, K640, K641, K642, K643, K644, K645, K648, |

|                                          |                         |                                                                                                                                                                                                                                                                                                                                                |
|------------------------------------------|-------------------------|------------------------------------------------------------------------------------------------------------------------------------------------------------------------------------------------------------------------------------------------------------------------------------------------------------------------------------------------|
|                                          |                         | K649, K5750, K5710, K5752, K5740, K5712, K5700, K5730, K5790, K5792, K5780, K5732, K5720, K210, K209, K208, K200, D800, D62, D649, R791                                                                                                                                                                                                        |
| Chronic renal insufficiency <sup>4</sup> | 582, 583, 585, 586, 587 | M3218, M3214, M3504, N050, N051, N052, N053, N054, N055, N056, N057, N058, N059, N060, N061, N062, N063, N064, N065, N066, N067, N068, N069, N070, N071, N072, N073, N074, N075, N076, N077, N078, N079, N08, N140, N142, N144, N150, N158, N159, N171, N16, N170, N172, N178, N179, N181, N182, N183, N184, N185, N186, N189, N19, N261, N269 |
|                                          |                         |                                                                                                                                                                                                                                                                                                                                                |

\*ICD-9 CM code based algorithms were converted to ICD-10 CM codes using the 2016 General Equivalence Mappings available from the Centers for Medicare and Medicaid Services at <https://www.cms.gov/Medicare/Coding/ICD10/2016-ICD-10-CM-and-GEMs.html>

**Table S2. Percentage of Residents Treated with Oral Anticoagulants by Race/Ethnicity.**

| <b>Time Period</b>       | <b>Overall</b> | <b>White</b> | <b>Black</b> | <b>Hispanic</b> | <b>API</b> | <b>Other/Unknown</b> |
|--------------------------|----------------|--------------|--------------|-----------------|------------|----------------------|
| <b>First half 2011</b>   |                |              |              |                 |            |                      |
| n                        | 17,895         | 15,404       | 1,421        | 688             | 257        | 125                  |
| Treated, %               | 42.4           | 42.6         | 41.5         | 42.4            | 32.7       | 43.5                 |
| <b>Second half 2011</b>  |                |              |              |                 |            |                      |
| n                        | 33,959         | 29,268       | 2,623        | 1,316           | 530        | 222                  |
| Treated, %               | 42.3           | 42.8         | 40.3         | 39.7            | 31.7       | 39.9                 |
| <b>First half 2012</b>   |                |              |              |                 |            |                      |
| n                        | 33,493         | 28,766       | 2,690        | 1,297           | 507        | 233                  |
| Treated, %               | 43.1           | 43.4         | 43.1         | 40.2            | 35.7       | 44.6                 |
| <b>Second half 2012</b>  |                |              |              |                 |            |                      |
| n                        | 33,956         | 29,062       | 2,724        | 1,357           | 554        | 269                  |
| Treated, %               | 42.8           | 43.2         | 42.0         | 39.9            | 32.9       | 37.8                 |
| <b>First half 2013*</b>  |                |              |              |                 |            |                      |
| n                        | 35,709         | 30,532       | 2,836        | 1,371           | 571        | 283                  |
| Treated, %               | 42.7           | 43.2         | 40.6         | 40.8            | 31.4       | 40.7                 |
| <b>Second half 2013*</b> |                |              |              |                 |            |                      |
| n                        | 37,118         | 31,524       | 2,926        | 1,454           | 590        | 300                  |
| Treated, %               | 42.8           | 43.5         | 40.9         | 39.1            | 29.3       | 39.0                 |
| <b>First half 2014</b>   |                |              |              |                 |            |                      |
| n                        | 36,183         | 30,808       | 3,041        | 1,425           | 587        | 322                  |
| Treated, %               | 43.7           | 44.4         | 42.3         | 39.4            | 30.7       | 41.3                 |
| <b>Second half 2014</b>  |                |              |              |                 |            |                      |
| n                        | 36,379         | 31,013       | 3,035        | 1,407           | 585        | 339                  |
| Treated, %               | 44.3           | 44.8         | 43.0         | 40.9            | 32.3       | 41.3                 |
| <b>First half 2015</b>   |                |              |              |                 |            |                      |
| n                        | 36,807         | 31,490       | 3,071        | 1,354           | 560        | 332                  |
| Treated, %               | 44.8           | 45.3         | 43.8         | 42.5            | 31.6       | 43.7                 |
| <b>Second half 2015</b>  |                |              |              |                 |            |                      |
| n                        | 37,644         | 32,222       | 3,068        | 1,410           | 595        | 349                  |
| Treated, %               | 45.5           | 46.0         | 43.8         | 43.0            | 33.8       | 43.8                 |
| <b>First half 2016</b>   |                |              |              |                 |            |                      |
| n                        | 37,474         | 31,801       | 3,228        | 1,489           | 601        | 355                  |
| Treated, %               | 47.0           | 47.4         | 47.7         | 42.9            | 37.6       | 43.7                 |
| <b>Second half 2016</b>  |                |              |              |                 |            |                      |
| n                        | 37,787         | 31,985       | 3,255        | 1,578           | 608        | 361                  |
| Treated, %               | 47.8           | 48.3         | 46.5         | 42.3            | 36.7       | 54.3                 |

\*Race/ethnicity missing for 116 residents in the first half of 2013 and 324 residents in the second half of 2013  
Abbreviations: Asian or Pacific Islander (API).

### Supplemental References:

1. Centers for Medicare and Medicaid Services (CMS). 2016 ICD-10-CM and GEMs. Accessed September 5, 2018 from <https://www.cms.gov/Medicare/Coding/ICD10/2016-ICD-10-CM-and-GEMs.html>.
2. Kumamaru H, Judd SE, Curtis JR, Ramachandran R, Hardy NC, Rhodes JD, Safford MM, Kissela BM, Howard G, Jalbert JJ, Brott TG, Setoguchi S. Validity of claims-based stroke algorithms in contemporary medicare data: Reasons for geographic and racial differences in stroke (REGARDS) study linked with medicare claims. *Circ Cardiovasc Qual Outcomes*. 2014;7:611-619.
3. Cunningham A, Stein CM, Chung CP, Daugherty JR, Smalley WE, Ray WA. An automated database case definition for serious bleeding related to oral anticoagulant use. *Pharmacoepidemiol Drug Saf*. 2011;20:560-6.
4. Winkelmayr WC, Schneeweiss S, Mogun H, Patrick AR, Avorn J, Solomon DH. Identification of individuals with CKD from Medicare claims data: a validation study. *Am J Kidney Dis*. 2005;46:225-32.
